# Supplementary material
Source: publisher figshare collection journal article supplement (https://acs.figshare.com/ndownloader/files/7336865)
Supplement: Supplementary file 1 [file 7336865]

Paper num,SMILES
12,Cc1ccsc1CNc1cnn(C)c(=O)c1Cl
8,Cn1ncc(NCc2ccc(F)cc2)c(Cl)c1=O
11,Cc1ccccc1CNc1cnn(C)c(=O)c1Cl
10,Cn1ncc(NCc2ccccc2)c(Cl)c1=O
15,CNc1cnn(C)c(=O)c1Cl
16,CC(C)Nc1cnn(C)c(=O)c1Cl
14,Cn1ncc(Nc2ccccc2)c(Cl)c1=O
13,Cc1ncsc1CNc1cnn(C)c(=O)c1Cl
18,Cc1cccc(Nc2cnn(C)c(=O)c2Cl)c1
21,CN1CCC(C1)Nc1cnn(C)c(=O)c1Cl
23,CN1CCCC(C1)Nc1cnn(C)c(=O)c1Cl
22,CN1CCC(CC1)Nc1cnn(C)c(=O)c1Cl
20,CN1CCc2c(C1)cccc2Nc1cnn(C)c(=O)c1Cl
(S)-23,CN1CCC[C@@H](C1)Nc1cnn(C)c(=O)c1Cl
(R)-23,CN1CCC[C@H](C1)Nc1cnn(C)c(=O)c1Cl
19,Cl.Cn1ncc(Nc2ccccc2CN)c(Cl)c1=O
27,CN1C[C@H](C[C@@H](C1)c1ccccc1)Nc1cnn(C)c(=O)c1Cl
"(R,R)-31",CN1C[C@@H](C[C@@H](C1)c1ccccc1)Nc1cnn(C)c(=O)c1Cl
"(S,S)-31",CN1C[C@@H](C[C@@H](C1)c1ccccc1)Nc1cnn(C)c(=O)c1Cl
"(R,R)-32",CN1C[C@@H](C[C@@H](C1)c1ccccc1)Nc1cnn(C)c(=O)c1Br
"(S,S)-32",CN1C[C@H](C[C@H](C1)c1ccccc1)Nc1cnn(C)c(=O)c1Br
